# Supplementary material for: Surface photovoltage predicts open circuit voltage in GaP/PEDOT:PSS and GaP/CuSCN heterojunction solar cells
Source: Royal Society of Chemistry journal article supplement (doi:10.1039/d4lf00225c), 2024-01-01
Supplement: d4lf00225c1.pdf [file d4lf00225c1.pdf]

**Supporting Information**

**Surface Photovoltage Predicts Open Circuit Voltage in  
GaP/PEDOT:PSS and GaP/CuSCN Heterojunction Solar Cells**

**Anna C. Kundmann<sup>\*a</sup>, Kathleen Becker<sup>a</sup>, and Frank E. Osterloh<sup>\*a</sup>**

*<sup>a</sup> Department of Chemistry, University of California, Davis. One Shields Avenue, Davis, CA, 95616, USA.*

*Fax: (+1)530 752 8995; \*E-mail: [fosterloh@ucdavis.edu](mailto:fosterloh@ucdavis.edu) (F.E.O.); \*Email: [ackundmann@ucdavis.edu](mailto:ackundmann@ucdavis.edu)*

*(A.C.K.)*

6 pages

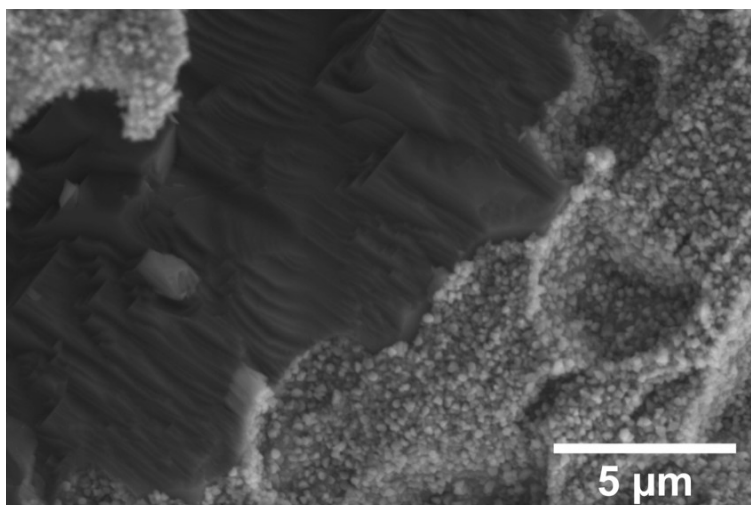

**Figure S1.** Scanning electron micrograph of a crack in an electrodeposited CuSCN film on an unpolished GaP wafer surface. The particles follow the rough contours of the GaP wafer.

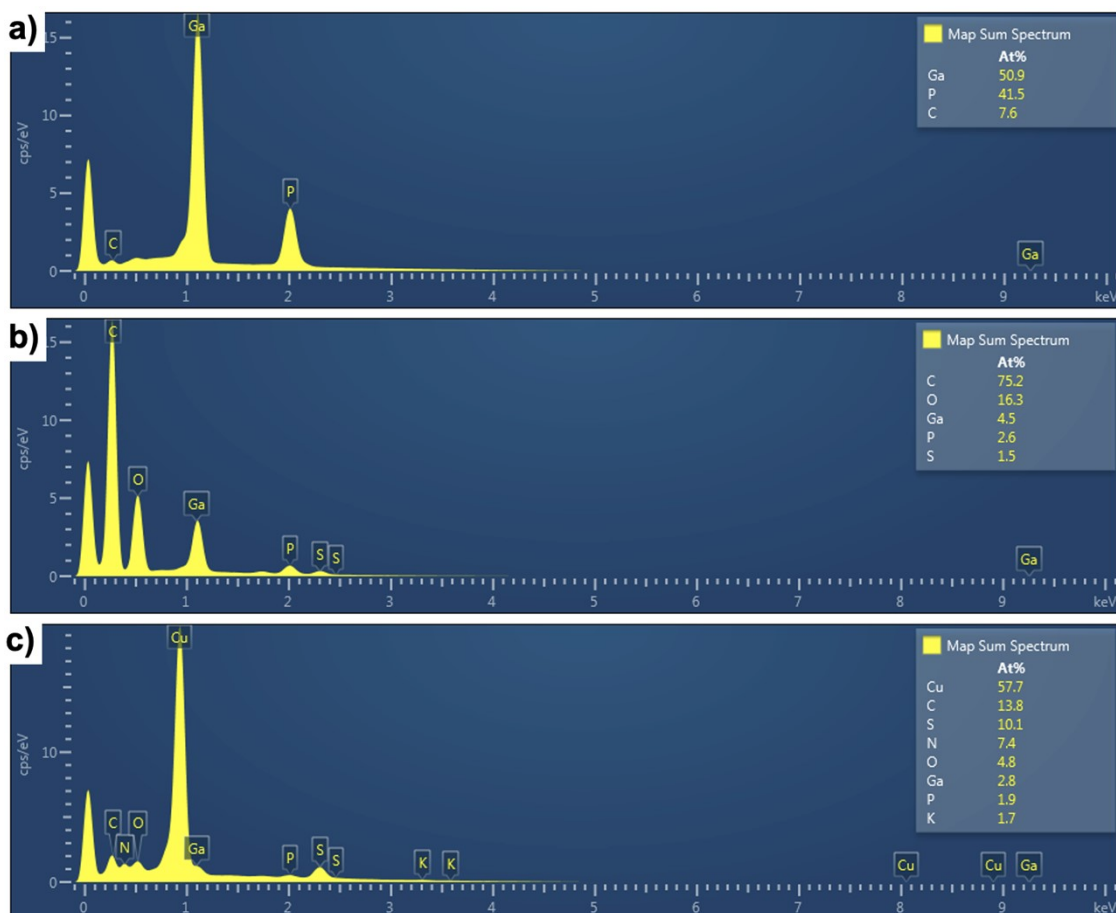

**Figure S2.** Energy dispersive X-ray spectroscopy (EDS) of etched nGaP wafer (a), PEDOT:PSS–n-GaP (b), and CuSCN–n-GaP (c). The beam voltage and current were 5 kV and 1.6 nA, respectively.

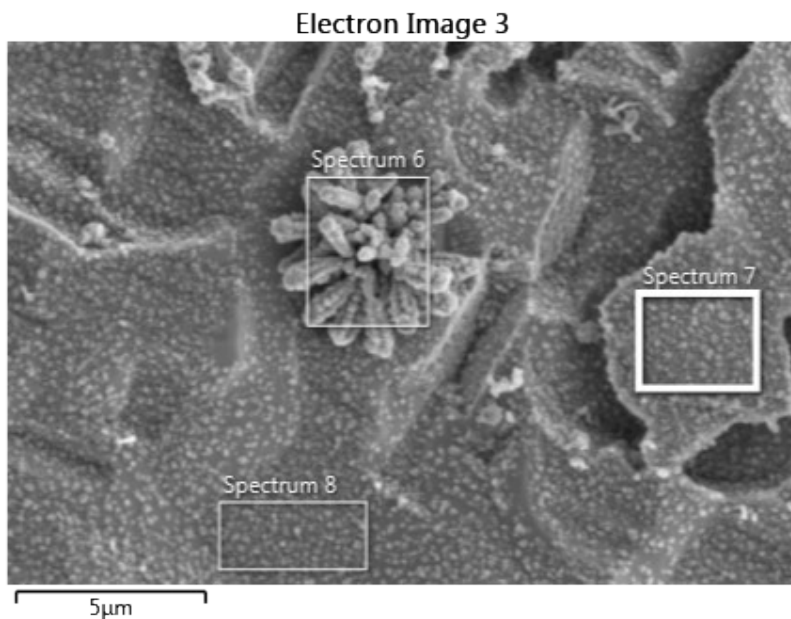

**Figure S3.** Scanning electron micrograph of a CuSCN film on GaP with a metallic copper cluster visible. EDS was performed on the cluster area (Spectrum 6) and separate film area (Spectrum 7; values given in **Table S1**), confirming that the cluster primarily contains copper.

**Table S1.** EDS results showing the atomic percent of elements in the CuSCN film in **Figure S3**.

| Element | Cluster, Spectrum 6 (At%) | Film, Spectrum 7 (At%) |
|---------|---------------------------|------------------------|
| Cu      | 66.3                      | 11.0                   |
| S       | 9.7                       | 7.5                    |
| C       | 11.8                      | 16.7                   |
| N       | 6.2                       | 8.5                    |

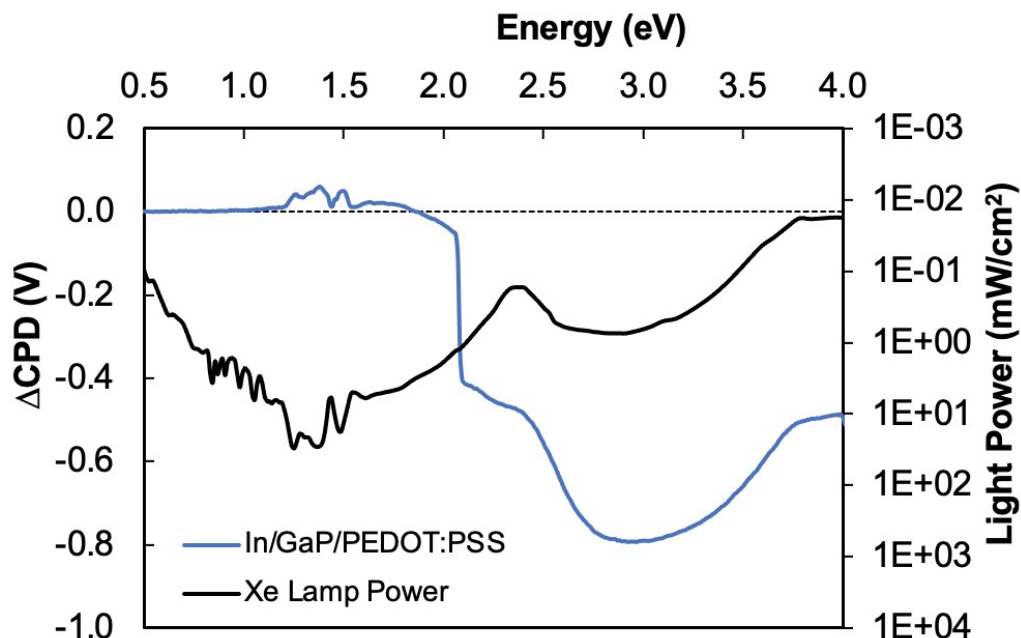

**Figure S4.** Surface photovoltage spectrum of n-type GaP wafer with indium back contact and PEDOT:PSS hole transport layer (In/GaP/PEDOT:PSS) co-plotted with the logarithm of the light power of the monochromated Xe arc lamp at the sample position.

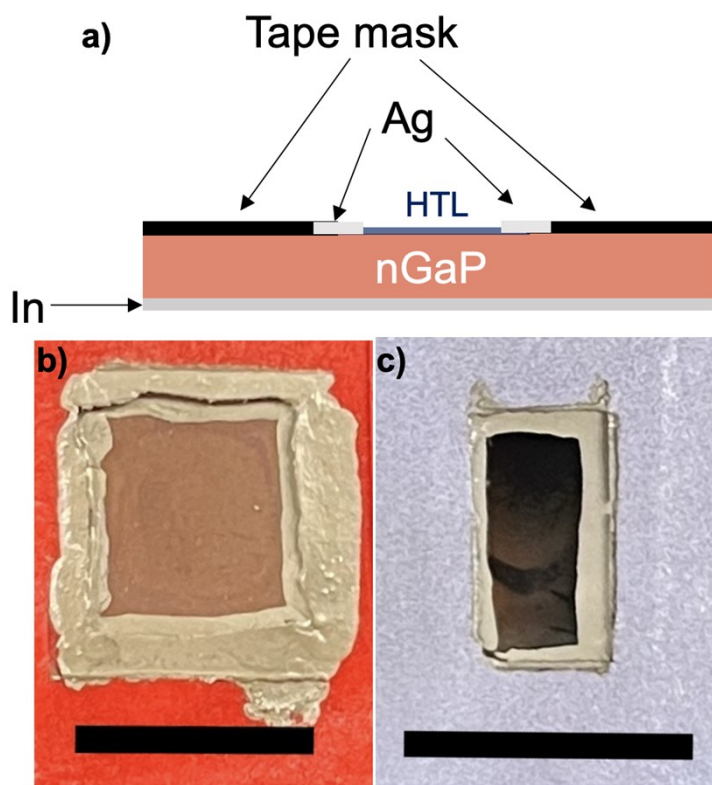

**Figure S5.** (a) Schematic side view of structure for n-GaP-based devices. Indium (In) is used as the back contact while silver paint is used as the front contact (Ag). Photograph of (b) champion PEDOT:PSS-based device, and of (c) champion CuSCN-based device. Scale bars are 1.00 cm.

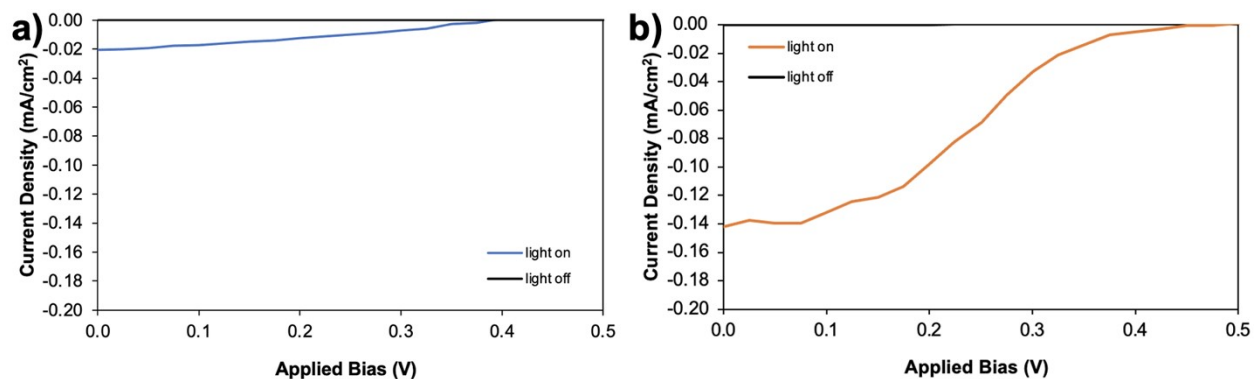

**Figure S6.**  $J$ - $V$  curves of second PEDOT:PSS-n-GaP (a) and CuSCN-n-GaP (b) devices in the dark (black line) and under simulated AM1.5G illumination (blue and orange lines, respectively).

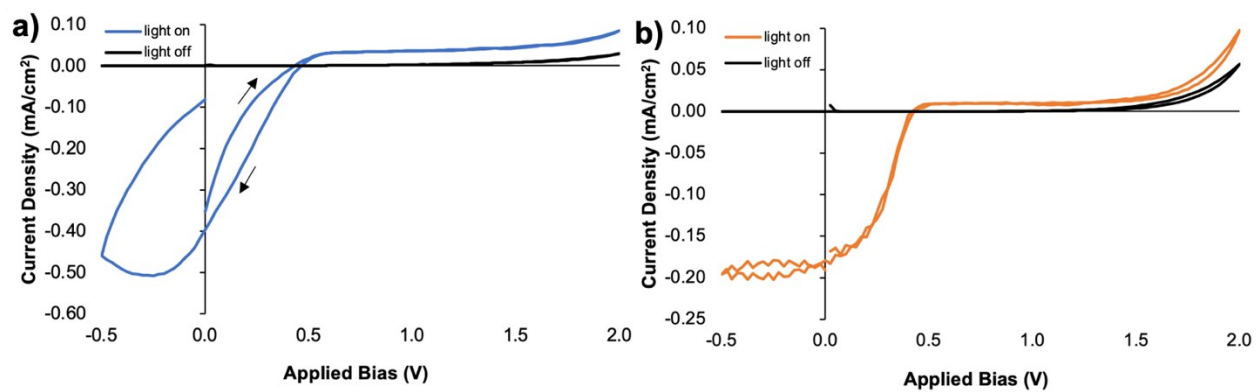

**Figure S7.** Full cyclic voltammetry curves for PEDOT:PSS-n-GaP (a) and CuSCN-n-GaP (b). Light source was a Xe lamp adjusted to simulate AM1.5G illumination.

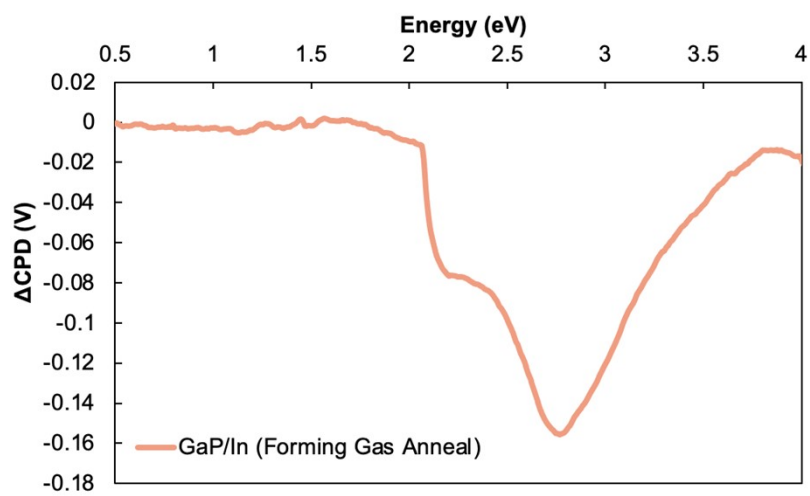

**Figure S8.** Surface photovoltage spectrum for a GaP wafer with In soldered on the back and annealed in 5% H<sub>2</sub> in N<sub>2</sub> for 10 min at 400 °C.
